# Supplementary material
Source: bioRxiv or medRxiv preprint supplement (https://medrxiv.org/highwire/filestream/92448/field_highwire_adjunct_files/0/2020.08.07.20169862-1.pdf)
Supplement: Supplementary file [file 2020.08.07.20169862-1.pdf]

12 Table S1: *P. vivax* proteins used in this study. Proteins were selected based on our previously validation study as being able to accurately  
 13 classify individuals as infected with *P. vivax* in the last 9-months when using IgG antibody responses, either individually or in combination [1].  
 14 References listed are for the protein production and purification method. Protein ID and annotations are from PlasmoDB (release 36  
 15 <http://plasmodb.org/plasmo/>) or GenBank. Where the protein ID has an A or B, it is used to match exactly to the proteins listed in our validation  
 16 manuscript. The Short Code listed is in reference to our original manuscript [1].

| Protein ID  | Short Code | Gene Annotation                                    | Protein length, aa | Construct, aa (size) | Expression System | Purification Method                     |
|-------------|------------|----------------------------------------------------|--------------------|----------------------|-------------------|-----------------------------------------|
| PVX_099980  | W01        | merozoite surface protein 1 (MSP1-19)              | 1751               | 1622-1729 (108)      | WGCF              | One-step Ni column                      |
| PVX_096995  | W02        | tryptophan-rich antigen (Pv-fam-a)                 | 480                | 61-end (420)         | WGCF              | One-step Ni column                      |
| PVX_112670  | W08        | unspecified product                                | 335                | 34-end (302)         | WGCF              | One-step Ni column                      |
| PVX_003770  | W12        | merozoite surface protein 5 (MSP5)                 | 387                | 23-365 (343)         | WGCF              | One-step Ni column                      |
| PVX_082700  | W27        | merozoite surface protein 7 (MSP7.1)               | 420                | 23-end (397)         | WGCF              | One-step Ni column                      |
| PVX_097680  | W28        | merozoite surface protein 3 (MSP3.3)               | 1016               | 21-end (996)         | WGCF              | One-step Ni column                      |
| PVX_097625  | W30        | merozoite surface protein 8 (MSP8), putative       | 487                | 24-463 (440)         | WGCF              | One-step Ni column                      |
| PVX_082670  | W31        | merozoite surface protein 7 (MSP7), putative       | 411                | 24-end (388)         | WGCF              | One-step Ni column                      |
| PVX_082735  | W34        | thrombospondin-related anonymous protein (TRAP)    | 556                | 26-493 (468)         | WGCF              | One-step Ni column                      |
| PVX_097720  | W39        | merozoite surface protein 3 (MSP3.10)              | 852                | 25-end (828)         | WGCF              | One-step Ni column                      |
| PVX_000930  | W40        | sexual stage antigen s16, putative                 | 140                | 31-end (110)         | WGCF              | One-step Ni column                      |
| PVX_094255B | W50        | reticulocyte binding protein 2b (RBP2b)            | 2806               | 161-1454 (1294)      | <i>E. coli</i>    | 2x affinity + size exclusion [2]        |
| AAV34130.1  | W57        | Duffy binding protein (DBP, region 2, AH strain)   | 237                | 1-237 (237)          | <i>E. coli</i>    | Ni, ion exchange, gel filtration [3]    |
| PVX_110810A | W53        | Duffy binding protein (DBP, region 2, Sal1 strain) | 1070               | 193-521 (329)        | <i>E. coli</i>    | Ni, ion exchange, gel filtration [3, 4] |

|             |     |                                               |      |                |                |                                         |
|-------------|-----|-----------------------------------------------|------|----------------|----------------|-----------------------------------------|
| PVX_087885B | W47 | rhoptry-associated membrane antigen, putative | 730  | 462-730 (269)  | WGCF           | One-step Ni column [5]                  |
| KMZ83376.1  | W58 | erythrocyte binding protein II (PvEBPII)      | 786  | 109-432 (324)  | <i>E. coli</i> | Ni, ion exchange, gel filtration [3, 4] |
| PVX_095055  | W55 | Rh5 interacting protein, putative (RIPR)      | 1075 | 552-1075 (524) | <i>E. coli</i> | 2x affinity + size exclusion [6]        |

17

18 Table S2: Direct comparison of AUC values for each protein for IgG versus IgM, for classifying recent infection in the past 9 months.

| Antigen     | Thailand |           | Brazil |           |
|-------------|----------|-----------|--------|-----------|
|             | IgM      | IgG       | IgM    | IgG       |
| PVX_099980  | 0.607    | 0.8117523 | 0.537  | 0.7870332 |
| PVX_096995  | 0.549    | 0.7457229 | 0.593  | 0.7243792 |
| PVX_112670  | 0.567    | 0.7553279 | 0.589  | 0.7306483 |
| PVX_003770  | 0.602    | 0.7530849 | 0.633  | 0.6703616 |
| PVX_082700  | 0.641    | 0.7587684 | 0.596  | 0.7436841 |
| PVX_097680  | 0.593    | 0.7049692 | 0.529  | 0.6507685 |
| PVX_097625  | 0.671    | 0.7670301 | 0.665  | 0.7456572 |
| PVX_082670  | 0.747    | 0.7268631 | 0.635  | 0.6978052 |
| PVX_082735  | 0.743    | 0.7019698 | 0.705  | 0.6598704 |
| PVX_097720  | 0.628    | 0.7894644 | 0.573  | 0.7270199 |
| PVX_000930  | 0.673    | 0.7899103 | 0.654  | 0.7811927 |
| PVX_094255B | 0.631    | 0.849134  | 0.560  | 0.8177998 |
| AAV34130.1  | 0.597    | 0.7397995 | 0.540  | 0.772517  |
| PVX_110810A | 0.554    | 0.7155953 | 0.496  | 0.7613065 |

|             |       |           |       |           |
|-------------|-------|-----------|-------|-----------|
| PVX_087885A | 0.615 | 0.7588708 | 0.591 | 0.7527885 |
| PVX_094255A | 0.675 | 0.8051379 | 0.581 | 0.7624446 |
| PVX_092995  | 0.640 | 0.7917883 | 0.599 | 0.7028894 |
| PVX_087885B | 0.771 | 0.8065824 | 0.715 | 0.7481328 |
| KMZ83376.1  | N/A   | N/A       | 0.617 | 0.7393093 |
| PVX_095055  | N/A   | N/A       | 0.624 | 0.7717238 |

19

20 **References:**

- 21 1. Longley RJ, White MT, Takashima E, et al. Development and validation of serological markers for detecting recent exposure to  
22 *Plasmodium vivax* infection. bioRxiv **2018**:481168.
- 23 2. Hietanen J, Chim-Ong A, Chiramanewong T, et al. Gene Models, Expression Repertoire, and Immune Response of *Plasmodium vivax*  
24 Reticulocyte Binding Proteins. Infect Immun **2015**; 84:677-85.
- 25 3. Cole-Tobian JL, Michon P, Biasor M, et al. Strain-specific duffy binding protein antibodies correlate with protection against infection  
26 with homologous compared to heterologous *Plasmodium vivax* strains in Papua New Guinean children. Infect Immun **2009**; 77:4009-  
27 17.
- 28 4. Franca CT, White MT, He WQ, et al. Identification of highly-protective combinations of *Plasmodium vivax* recombinant proteins for  
29 vaccine development. Elife **2017**; 6.
- 30 5. Lu F, Li J, Wang B, et al. Profiling the humoral immune responses to *Plasmodium vivax* infection and identification of candidate  
31 immunogenic rhoptry-associated membrane antigen (RAMA). J Proteomics **2014**; 102:66-82.
- 32 6. Healer J, Thompson JK, Riglar DT, et al. Vaccination with conserved regions of erythrocyte-binding antigens induces neutralizing  
33 antibodies against multiple strains of *Plasmodium falciparum*. PLoS One **2013**; 8:e72504.

34
